# Supplementary material
Source: publisher figshare collection journal article supplement (https://sage.figshare.com/ndownloader/files/20333451)
Supplement: Supplementary file 1 [file 20333451]

Reviewer 1 v.2

Comments to the Author

I am happy with the changes and suggest acceptance.
